# Supplementary material
Source: PubMed Central journal article supplement (PMC3576461)
Supplement: supp_120095_ulcer-barkun-2-at.pdf [file supp_120095_ulcer-barkun-2-at.pdf]

**Appendix 2 (as supplied by authors): Compliance to Guideline Endpoints – Site Level Analysis**

|                                                                                                                                                                                                               | Pre-implementation                              |                                            | Post-implementation                             |                                            | Between-group Comparisons - P Value <sup>y</sup> |      |      |
|---------------------------------------------------------------------------------------------------------------------------------------------------------------------------------------------------------------|-------------------------------------------------|--------------------------------------------|-------------------------------------------------|--------------------------------------------|--------------------------------------------------|------|------|
| <b>Guideline</b>                                                                                                                                                                                              | <b>Compliance of Experimental Group, % (SD)</b> | <b>Compliance of Control Group, % (SD)</b> | <b>Compliance of Experimental Group, % (SD)</b> | <b>Compliance of Control Group, % (SD)</b> | (1)                                              | (2)  | (3)  |
| Primary Outcome                                                                                                                                                                                               |                                                 |                                            |                                                 |                                            |                                                  |      |      |
| Endoscopic hemostasis followed by high-dose IV PPI                                                                                                                                                            | 13 (18)                                         | 6 (10)                                     | 7 (10)                                          | 5 (12)                                     | .188                                             | .623 | .472 |
| <b>Secondary Outcomes</b>                                                                                                                                                                                     |                                                 |                                            |                                                 |                                            |                                                  |      |      |
| Injection and/or thermal coagulation without clips and bolus IV PPI followed by infusion for 72 hours for high-risk ulcers                                                                                    | 8 (11)                                          | 4(9)                                       | 4 (9)                                           | 5 (12)                                     | .122                                             | .210 | .120 |
| Injection and/or thermal coagulation stigmata with clips and bolus IV PPI followed by 8 mg/hr infusion for 72 hours & no oral PPI. If pre-endoscopy infusion, absence of bolus IV PPI post-endoscopy ignored. | 72 (27)                                         | 61 (25)                                    | 57 (31)                                         | 67 (30)                                    | .033                                             | .097 | .094 |
| Injection and/or thermal coagulation with clips and Pre-endoscopy bolus of PPI plus 80-mg bolus IV PPI followed by 8 mg/hr infusion for 72 hours post-endoscopic therapy & no oral PPI.                       | 1 (4)                                           | 1(5)                                       | 1 (3)                                           | 1 (4)                                      | .899                                             | .913 | .819 |
| Injection and/or thermal coagulation upon endoscopy for high-risk ulcers with clips alone                                                                                                                     | 82 (22)                                         | 74 (25)                                    | 74 (30)                                         | 77 (31)                                    | .193                                             | .346 | .368 |
| Injection and/or thermal coagulation without clips for high-risk ulcers alone                                                                                                                                 | 46 (30)                                         | 49 (35)                                    | 54 (32)                                         | 54 (37)                                    | .713                                             | .817 | .868 |
| 80-mg IV bolus followed by 8 mg/hr PPI infusion for 72 hours post-endoscopic therapy & no oral PPI.                                                                                                           | 15 (19)                                         | 9 (13)                                     | 10 (12)                                         | 10 (20)                                    | .305                                             | .660 | .529 |
| 80-mg bolus IV PPI followed by 8 mg/hr infusion for 72 hours post-endoscopic therapy & no oral PPI. If pre-endoscopy infusion, absence of bolus IV PPI post-endoscopy ignored.                                | 83 (16)                                         | 82 (16)                                    | 83 (19)                                         | 88 (14)                                    | .299                                             | .277 | .329 |
| Pre-endoscopy bolus of PPI plus 80-mg bolus IV PPI followed by 8 mg/hr infusion for 72 hours post-endoscopic therapy & no oral PPI.                                                                           | 1 (3)                                           | 1 (4)                                      | 1 (5)                                           | 4 (13)                                     | .460                                             | .347 | .272 |

|                                                                                                  |         |         |         |         |      |      |      |
|--------------------------------------------------------------------------------------------------|---------|---------|---------|---------|------|------|------|
| Early endoscopy (in the first 24 hours) with risk classification by clinical/endoscopic criteria | 62 (18) | 65 (13) | 58 (24) | 66 (16) | .417 | .208 | .113 |
| No hemostasis for low risk lesion                                                                | 86 (25) | 94 (10) | 93 (12) | 88 (17) | .050 | .138 | .110 |
| Endoscopic Hemostasis for adherent clot                                                          | 89 (28) | 87 (29) | 76 (31) | 81 (37) | .131 | .268 | .781 |
| Endoscopic Hemostasis for other active bleeding or visible vessel                                | 87 (16) | 83 (21) | 94 (9)  | 86 (19) | .619 | .115 | .107 |

γ (1) Unpaired t-test on differences, (2) Analysis of covariance adjusting for baseline (3) Analysis of covariance adjusting for baseline, bed size ( $\leq 400$  vs  $>400$ ), Ontario (yes/no) and interaction of bed size and Ontario

SD= Standard deviation
